# Supplementary material for: Quantitative Shotgun Proteomic Analysis of Bacteria after Overexpression of Recombinant Spider Miniature Spidroin, MaSp1
Source: MDPI journal article supplement (doi:10.3390/ijms25063556), 2024-03-21
Supplement: s1 [file s1]

| Gene Name | Protein Name                                     | Accession Number | Fold Change Ratios |
|-----------|--------------------------------------------------|------------------|--------------------|
| lacA      | Galactoside O-acetyltransferase*                 | P07464           | +OLR               |
| qorB      | Quinone oxidoreductase 2                         | P39315           | +OLR               |
| cnoX      | Chaperedoxin                                     | P77395           | +OLR               |
| dadX      | Alanine racemase, catabolic                      | P29012           | +OLR               |
| yiaF      | Uncharacterized protein YiaF                     | P0ADK0           | +OLR               |
| panB      | 3-methyl-2-oxobutanoate hydroxymethyltransferase | P31057           | +OLR               |
| yajG      | Uncharacterized lipoprotein YajG                 | P0ADA5           | +OLR               |
| N/A       | MaSp1 NTD-4x-CTD                                 | N/A              | +OLR               |
| lacZ      | Beta-galactosidase*                              | P00722           | +OLR               |
| yfcZ      | UPF0381 protein YfcZ                             | P0AD33           | +14.00             |
| wzzB      | Chain length determinant protein                 | P76372           | +11.00             |
| kdsB      | 3-deoxy-manno-octulosonate cytidyltransferase    | P04951           | +10.00             |
| efeO      | Iron uptake system component EfeO                | P0AB24           | +10.00             |
| metQ      | D-methionine-binding lipoprotein MetQ            | P28635           | +9.80              |
| ydgJ      | Uncharacterized oxidoreductase YdgJ              | P77376           | +9.00              |
| osmC      | Peroxiredoxin OsmC                               | P0C0L2           | +8.50              |
| cdd       | Cytidine deaminase                               | P0ABF6           | +7.67              |
| ycdY      | Chaperone protein YcdY                           | P75915           | +7.50              |
| cyoB      | Cytochrome bo(3) ubiquinol oxidase subunit 1     | P0ABI8           | +6.83              |
| speB      | Agmatinase                                       | P60651           | +6.60              |
| ushA      | Protein UshA                                     | P07024           | +6.00              |
| yicC      | UPF0701 protein YicC                             | P23839           | +5.75              |
| ybgl      | GTP cyclohydrolase 1 type 2 homolog              | P0AFP6           | +5.50              |
| yfcE      | Phosphodiesterase YfcE                           | P67095           | +5.40              |
| nagA      | N-acetylglucosamine-6-phosphate deacetylase      | P0AF18           | +5.00              |
| acrB      | Multidrug efflux pump subunit AcrB               | P31224           | +5.00              |
| gpr       | L-glyceraldehyde 3-phosphate reductase           | Q46851           | +4.86              |
| btsT      | Pyruvate/proton symporter BtsT                   | P39396           | +4.86              |
| iscX      | Protein IscX                                     | P0C0L9           | +4.75              |
| gor       | Glutathione reductase                            | P06715           | +4.00              |
| fnt       | Methionyl-tRNA formyltransferase                 | P23882           | +3.90              |
| gnsA      | Protein GnsA                                     | P0AC92           | +3.89              |
| maeA      | NAD-dependent malic enzyme                       | P26616           | +3.80              |
| eptA      | Phosphoethanolamine transferase EptA             | P30845           | +3.60              |
| grcA      | Autonomous glycyl radical cofactor               | P68066           | +3.56              |
| zntA      | Zinc/cadmium/lead-transporting P-type ATPase     | P37617           | +3.40              |
| melA      | Alpha-galactosidase*                             | P06720           | +3.37              |
| mtlD      | Mannitol-1-phosphate 5-dehydrogenase             | P09424           | +3.27              |
| iscA      | Iron-binding protein IscA                        | P0AAC8           | +3.17              |
| rihC      | Non-specific ribonucleoside hydrolase RihC       | P22564           | +3.17              |
| yhhX      | Uncharacterized oxidoreductase YhhX              | P46853           | +3.14              |

|      |                                                                |        |       |
|------|----------------------------------------------------------------|--------|-------|
| gpml | 2,3-bisphosphoglycerate-independent phosphoglycerate mutase    | P37689 | +3.03 |
| lpp  | Major outer membrane lipoprotein Lpp                           | P69776 | +3.03 |
| yfcD | Uncharacterized Nudix hydrolase YfcD                           | P65556 | +3.03 |
| cspA | Cold shock protein CspA                                        | P0A9X9 | +3.00 |
| carA | Carbamoyl-phosphate synthase small chain                       | P0A6F1 | +3.00 |
| dcrB | Inner membrane lipoprotein DcrB                                | P0AEE1 | +3.00 |
| hslO | 33 kDa chaperonin                                              | P0A6Y5 | +3.00 |
| trxC | Thioredoxin 2                                                  | P0AGG4 | +3.00 |
| malM | Maltose operon periplasmic protein                             | P03841 | +3.00 |
| cyoA | Cytochrome bo(3) ubiquinol oxidase subunit 2                   | P0ABJ1 | +2.82 |
| frdB | Fumarate reductase iron-sulfur subunit                         | P0AC47 | +2.79 |
| gloA | Lactoylglutathione lyase                                       | P0AC81 | +2.77 |
| fldA | Flavodoxin 1                                                   | P61949 | +2.71 |
| curA | NADPH-dependent curcumin reductase                             | P76113 | +2.71 |
| gatC | PTS system galactitol-specific EIIC component                  | P69831 | +2.70 |
| pepQ | Xaa-Pro dipeptidase                                            | P21165 | +2.68 |
| pnp  | Polyribonucleotide nucleotidyltransferase                      | P05055 | +2.68 |
| guaA | GMP synthase [glutamine-hydrolyzing]                           | P04079 | +2.67 |
| yjjA | Uncharacterized protein YjjA                                   | P18390 | +2.67 |
| pgi  | Glucose-6-phosphate isomerase                                  | P0A6T1 | +2.53 |
| ppiD | Periplasmic chaperone PpiD                                     | P0ADY1 | +2.52 |
| fruB | Multiphosphoryl transfer protein                               | P69811 | +2.50 |
| elbB | Glyoxalase ElbB                                                | P0ABU5 | +2.50 |
| ycaR | UPF0434 protein YcaR                                           | P0AAZ7 | +2.45 |
| arcB | Aerobic respiration control sensor protein ArcB                | P0AEC3 | +2.41 |
| glnS | Glutamine--tRNA ligase                                         | P00962 | +2.36 |
| eda  | KHG/KDPG aldolase                                              | P0A955 | +2.30 |
| ybiB | Uncharacterized protein YbiB                                   | P30177 | +2.30 |
| iscU | Iron-sulfur cluster assembly scaffold protein IscU             | P0ACD4 | +2.28 |
| hldD | ADP-L-glycero-D-manno-heptose-6-epimerase                      | P67910 | +2.14 |
| osmY | Osmotically-inducible protein Y                                | P0AFH8 | +2.14 |
| secD | Protein translocase subunit SecD                               | P0AG90 | +2.06 |
| arnB | UDP-4-amino-4-deoxy-L-arabinose--oxoglutarate aminotransferase | P77690 | +2.05 |
| ygiC | Putative acid--amine ligase YgiC                               | P0ADT5 | +2.00 |
| gpsA | Glycerol-3-phosphate dehydrogenase [NAD(P)+]                   | P0A6S7 | +2.00 |
| yjdM | Protein YjdM                                                   | P0AFJ1 | +1.96 |
| elaB | Protein ElaB                                                   | P0AEH5 | +1.95 |
| katG | Catalase-peroxidase                                            | P13029 | +1.93 |
| acpP | Acyl carrier protein                                           | P0A6A8 | +1.89 |
| pal  | Peptidoglycan-associated lipoprotein                           | P0A912 | +1.86 |
| deoD | Purine nucleoside phosphorylase DeoD-type                      | P0ABP8 | +1.82 |

|       |                                                                                           |        |       |
|-------|-------------------------------------------------------------------------------------------|--------|-------|
| cmk   | Cytidylate kinase                                                                         | P0A6I0 | +1.80 |
| eptC  | Phosphoethanolamine transferase EptC                                                      | P0CB39 | +1.79 |
| yibT  | Uncharacterized protein YibT                                                              | Q2M7R5 | +1.79 |
| glpQ  | Glycerophosphodiester phosphodiesterase, periplasmic                                      | P09394 | +1.76 |
| pdxJ  | Pyridoxine 5'-phosphate synthase                                                          | P0A794 | +1.76 |
| maeB  | NADP-dependent malic enzyme                                                               | P76558 | +1.75 |
| rplL  | 50S ribosomal protein L7/L12                                                              | P0A7K2 | +1.71 |
| glpD  | Aerobic glycerol-3-phosphate dehydrogenase                                                | P13035 | +1.70 |
| dapA  | 4-hydroxy-tetrahydrodipicolinate synthase                                                 | P0A6L2 | +1.69 |
| prlC  | Oligopeptidase A                                                                          | P27298 | +1.68 |
| cpdB  | 2',3'-cyclic-nucleotide 2'-phosphodiesterase/3'-nucleotidase                              | P08331 | +1.68 |
| ribE  | 6,7-dimethyl-8-ribityllumazine synthase                                                   | P61714 | +1.65 |
| atpF  | ATP synthase subunit b                                                                    | P0ABA0 | +1.63 |
| rpe   | Ribulose-phosphate 3-epimerase                                                            | P0AG07 | +1.61 |
| hdhA  | 7alpha-hydroxysteroid dehydrogenase                                                       | P0AET8 | +1.60 |
| ridA  | 2-iminobutanoate/2-iminopropanoate deaminase                                              | P0AF93 | +1.59 |
| gmhA  | Phosphoheptose isomerase                                                                  | P63224 | +1.59 |
| aspC  | Aspartate aminotransferase                                                                | P00509 | +1.57 |
| trxA  | Thioredoxin 1                                                                             | P0AA25 | +1.56 |
| yjbJ  | UPF0337 protein YjbJ                                                                      | P68206 | +1.53 |
| acrA  | Multidrug efflux pump subunit AcrA                                                        | P0AE06 | +1.52 |
| zapB  | Cell division protein ZapB                                                                | P0AF36 | +1.52 |
| tpx   | Thiol peroxidase                                                                          | P0A862 | +1.51 |
| pgk   | Phosphoglycerate kinase                                                                   | P0A799 | +1.51 |
| ptsl  | Phosphoenolpyruvate-protein phosphotransferase                                            | P08839 | +1.49 |
| nusA  | Transcription termination/antitermination protein NusA                                    | P0AFF6 | +1.49 |
| pspA  | Phage shock protein A                                                                     | P0AFM6 | +1.48 |
| cydA  | Cytochrome bd-I ubiquinol oxidase subunit 1                                               | P0ABJ9 | +1.47 |
| gnd   | 6-phosphogluconate dehydrogenase, decarboxylating                                         | P00350 | +1.46 |
| dnaK  | Chaperone protein DnaK                                                                    | P0A6Y8 | +1.44 |
| sdhB  | Succinate dehydrogenase iron-sulfur subunit                                               | P07014 | +1.42 |
| htpG  | Chaperone protein HtpG                                                                    | P0A6Z3 | +1.42 |
| ackA  | Acetate kinase                                                                            | P0A6A3 | +1.42 |
| ahpC  | Alkyl hydroperoxide reductase C                                                           | P0AE08 | +1.42 |
| tsf   | Elongation factor Ts                                                                      | P0A6P1 | +1.41 |
| rpsA  | 30S ribosomal protein S1                                                                  | P0AG67 | +1.37 |
| oppA  | Periplasmic oligopeptide-binding protein                                                  | P23843 | +1.34 |
| ompA  | Outer membrane protein A                                                                  | P0A910 | +1.31 |
| aceF  | Dihydrolipoyllysine-residue acetyltransferase component of pyruvate dehydrogenase complex | P06959 | +1.30 |
| groEL | Chaperonin GroEL                                                                          | P0A6F5 | +1.27 |
| putA  | Bifunctional protein PutA                                                                 | P09546 | +1.25 |
| eno   | Enolase                                                                                   | P0A6P9 | +1.22 |

|      |                                                                    |        |       |
|------|--------------------------------------------------------------------|--------|-------|
| rplJ | 50S ribosomal protein L10                                          | P0A7J3 | +1.21 |
| rpsC | 30S ribosomal protein S3                                           | P0A7V3 | -1.02 |
| sucD | Succinate--CoA ligase [ADP-forming] subunit alpha                  | P0AGE9 | -1.03 |
| rplI | 50S ribosomal protein L9                                           | P0A7R1 | -1.04 |
| rplE | 50S ribosomal protein L5                                           | P62399 | -1.05 |
| gatD | Galactitol 1-phosphate 5-dehydrogenase                             | P0A9S3 | -1.05 |
| rplR | 50S ribosomal protein L18                                          | P0C018 | -1.06 |
| rho  | Transcription termination factor Rho                               | P0AG30 | -1.06 |
| gapA | Glyceraldehyde-3-phosphate dehydrogenase A                         | P0A9B2 | -1.06 |
| raiA | Ribosome-associated inhibitor A                                    | P0AD49 | -1.06 |
| rplM | 50S ribosomal protein L13                                          | P0AA10 | -1.06 |
| ptsH | Phosphocarrier protein HPr                                         | P0AA04 | -1.06 |
| rpsL | 30S ribosomal protein S12                                          | P0A7S3 | -1.07 |
| rpsS | 30S ribosomal protein S19                                          | P0A7U3 | -1.07 |
| infC | Translation initiation factor IF-3                                 | P0A707 | -1.07 |
| pta  | Phosphate acetyltransferase                                        | P0A9M8 | -1.07 |
| tnaA | Tryptophanase                                                      | P0A853 | -1.07 |
| pyrG | CTP synthase                                                       | P0A7E5 | -1.08 |
| rpmG | 50S ribosomal protein L33                                          | P0A7N9 | -1.08 |
| rplB | 50S ribosomal protein L2                                           | P60422 | -1.08 |
| rpmC | 50S ribosomal protein L29                                          | P0A7M6 | -1.08 |
| aceA | Isocitrate lyase                                                   | P0A9G6 | -1.09 |
| rpsE | 30S ribosomal protein S5                                           | P0A7W1 | -1.10 |
| ydch | Uncharacterized protein YdcH                                       | P0ACW6 | -1.10 |
| hns  | DNA-binding protein H-NS                                           | P0ACF8 | -1.10 |
| rpsR | 30S ribosomal protein S18                                          | P0A7T7 | -1.10 |
| rplX | 50S ribosomal protein L24                                          | P60624 | -1.11 |
| rplV | 50S ribosomal protein L22                                          | P61175 | -1.11 |
| rpsF | 30S ribosomal protein S6                                           | P02358 | -1.11 |
| hslU | ATP-dependent protease ATPase subunit HslU                         | P0A6H5 | -1.11 |
| rplF | 50S ribosomal protein L6                                           | P0AG55 | -1.12 |
| skp  | Chaperone protein Skp                                              | P0AEU7 | -1.13 |
| glyA | Serine hydroxymethyltransferase                                    | P0A825 | -1.13 |
| rpsG | 30S ribosomal protein S7                                           | P02359 | -1.13 |
| dapD | 2,3,4,5-tetrahydropyridine-2,6-dicarboxylate N-succinyltransferase | P0A9D8 | -1.13 |
| degP | Periplasmic serine endoprotease DegP                               | P0C0V0 | -1.14 |
| rplY | 50S ribosomal protein L25                                          | P68919 | -1.14 |
| rpsJ | 30S ribosomal protein S10                                          | P0A7R5 | -1.14 |
| rpsD | 30S ribosomal protein S4                                           | P0A7V8 | -1.15 |
| rpsT | 30S ribosomal protein S20                                          | P0A7U7 | -1.15 |
| rpsI | 30S ribosomal protein S9                                           | P0A7X3 | -1.16 |
| rpsH | 30S ribosomal protein S8                                           | P0A7W7 | -1.17 |

|      |                                                                  |        |        |
|------|------------------------------------------------------------------|--------|--------|
| rplW | 50S ribosomal protein L23                                        | P0ADZ0 | -1.17  |
| stpA | DNA-binding protein StpA                                         | P0ACG1 | -1.18  |
| tufB | Elongation factor Tu 2                                           | P0CE48 | -1.18  |
| tufA | Elongation factor Tu 1                                           | P0CE47 | -1.18  |
| pykA | Pyruvate kinase II                                               | P21599 | -1.18  |
| rplP | 50S ribosomal protein L16                                        | P0ADY7 | -1.18  |
| rpmB | 50S ribosomal protein L28                                        | P0A7M2 | -1.19  |
| cysK | Cysteine synthase A                                              | P0ABK5 | -1.19  |
| rpoC | DNA-directed RNA polymerase subunit beta                         | P0A8T7 | -1.20  |
| glyS | Glycine--tRNA ligase beta subunit                                | P00961 | -1.20  |
| rpmI | 50S ribosomal protein L35                                        | P0A7Q1 | -1.21  |
| rpmH | 50S ribosomal protein L34                                        | P0A7P5 | -1.24  |
| eco  | Ecotin                                                           | P23827 | -1.24  |
| glnH | Glutamine-binding periplasmic protein                            | P0AEQ3 | -1.27  |
| accC | Biotin carboxylase                                               | P24182 | -1.28  |
| csrA | Carbon storage regulator                                         | P69913 | -1.29  |
| clpA | ATP-dependent Clp protease ATP-binding subunit ClpA              | P0ABH9 | -1.30  |
| rplS | 50S ribosomal protein L19                                        | P0A7K6 | -1.30  |
| hupA | DNA-binding protein HU-alpha                                     | P0ACF0 | -1.30  |
| mreB | Cell shape-determining protein MreB                              | P0A9X4 | -1.32  |
| argG | Argininosuccinate synthase                                       | P0A6E4 | -1.35  |
| ydgH | Protein YdgH                                                     | P76177 | -1.35  |
| ppiA | Peptidyl-prolyl cis-trans isomerase A                            | P0AFL3 | -1.37  |
| rplN | 50S ribosomal protein L14                                        | P0ADY3 | -1.37  |
| srnB | ATP-dependent RNA helicase SrmB                                  | P21507 | -1.39  |
| crp  | cAMP-activated global transcriptional regulator CRP              | P0ACJ8 | -1.46  |
| rpmF | 50S ribosomal protein L32                                        | P0A7N4 | -1.48  |
| cra  | Catabolite repressor/activator                                   | P0ACP1 | -1.53  |
| ytfQ | Galactofuranose-binding protein YtfQ                             | P39325 | -1.57  |
| rnR  | Ribonuclease R                                                   | P21499 | -1.60  |
| rpsM | 30S ribosomal protein S13                                        | P0A7S9 | -1.61  |
| asnA | Aspartate--ammonia ligase                                        | P00963 | -1.77  |
| lepA | Elongation factor 4                                              | P60785 | -1.90  |
| spy  | Periplasmic chaperone Spy                                        | P77754 | -3.25  |
| galS | HTH-type transcriptional regulator GalS                          | P25748 | -3.60  |
| dnaX | DNA polymerase III subunit tau                                   | P06710 | -4.33  |
| ppk  | Polyphosphate kinase                                             | P0A7B1 | -5.00  |
| mgla | Galactose/methyl galactoside import ATP-binding protein<br>MglA* | P0AAG8 | -5.50  |
| pliG | Inhibitor of g-type lysozyme                                     | P76002 | -6.00  |
| hrpA | ATP-dependent RNA helicase HrpA                                  | P43329 | -12.00 |
| mgIB | D-galactose-binding periplasmic protein*                         | P0AEE5 | -OLR   |
| rnpA | Ribonuclease P protein component                                 | P0A7Y8 | -OLR   |

|      |                                |        |      |
|------|--------------------------------|--------|------|
| mntR | Transcriptional regulator MntR | P0A9F1 | -OLR |
|------|--------------------------------|--------|------|
