# Supplementary material for: Quantitative Shotgun Proteomic Analysis of Bacteria after Overexpression of Recombinant Spider Miniature Spidroin, MaSp1
Source: MDPI journal article supplement (doi:10.3390/ijms25063556), 2024-03-21
Supplement: s1 [file s1]

| <b>Gene Name</b> | <b>Protein Name</b>                                           | <b>Accession Number</b> | <b>Fold Change Ratios</b> |
|------------------|---------------------------------------------------------------|-------------------------|---------------------------|
| lacA             | Galactoside O-acetyltransferase*                              | P07464                  | +OLR                      |
| lacZ             | Beta-galactosidase*                                           | P00722                  | +270.33                   |
| N/A              | MaSp1 NTD-2x-CTD                                              | N/A                     | +12.09                    |
| ybgI             | GTP cyclohydrolase 1 type 2 homolog                           | P0AFP6                  | +3.57                     |
| mela             | Alpha-galactosidase*                                          | P06720                  | +2.30                     |
| pnp              | Polyribonucleotide nucleotidyltransferase                     | P05055                  | +1.94                     |
| slyD             | FKBP-type peptidyl-prolyl cis-trans isomerase SlyD            | P0A9K9                  | +1.52                     |
| htpG             | Chaperone protein HtpG                                        | P0A6Z3                  | +1.33                     |
| katG             | Catalase-peroxidase                                           | P13029                  | +1.28                     |
| tig              | Trigger factor                                                | P0A850                  | +1.24                     |
| rpsA             | 30S ribosomal protein S1                                      | P0AG67                  | +1.23                     |
| dnaK             | Chaperone protein DnaK                                        | P0A6Y8                  | +1.22                     |
| rplL             | 50S ribosomal protein L7/L12                                  | P0A7K2                  | +1.20                     |
| ahpC             | Alkyl hydroperoxide reductase C                               | P0AE08                  | +1.17                     |
| rpoC             | DNA-directed RNA polymerase subunit beta                      | P0A8T7                  | -1.12                     |
| tnaA             | Tryptophanase                                                 | P0A853                  | -1.13                     |
| gapA             | Glyceraldehyde-3-phosphate dehydrogenase A                    | P0A9B2                  | -1.14                     |
| hupB             | DNA-binding protein HU-beta                                   | P0ACF4                  | -1.15                     |
| lpdA             | Dihydrolipoyl dehydrogenase                                   | P0A9P0                  | -1.21                     |
| tufB             | Elongation factor Tu 2                                        | P0CE48                  | -1.25                     |
| tufA             | Elongation factor Tu 1                                        | P0CE47                  | -1.25                     |
| ytfQ             | Galactofuranose-binding protein YtfQ                          | P39325                  | -1.64                     |
| gatB             | PTS system galactitol-specific EIIB component                 | P37188                  | -1.82                     |
| pliG             | Inhibitor of g-type lysozyme                                  | P76002                  | -3.33                     |
| mdoG             | Glucans biosynthesis protein G                                | P33136                  | -4.20                     |
| galS             | HTH-type transcriptional regulator GalS                       | P25748                  | -6.50                     |
| mgIA             | Galactose/methyl galactoside import ATP-binding protein MglA* | P0AAG8                  | -12.00                    |
| mgIB             | D-galactose-binding periplasmic protein*                      | P0AEE5                  | -OLR                      |
